# Supplementary material for: Cytoskeletal variations in an asymmetric cell division support diversity in nematode sperm size and sex ratios
Source: Oxford University Press journal article supplement (doi:10.1242/dev.153841), 2017-08-22
Supplement: dev153841supp.pdf [file dev153841supp.pdf]

## Supplemental Movies

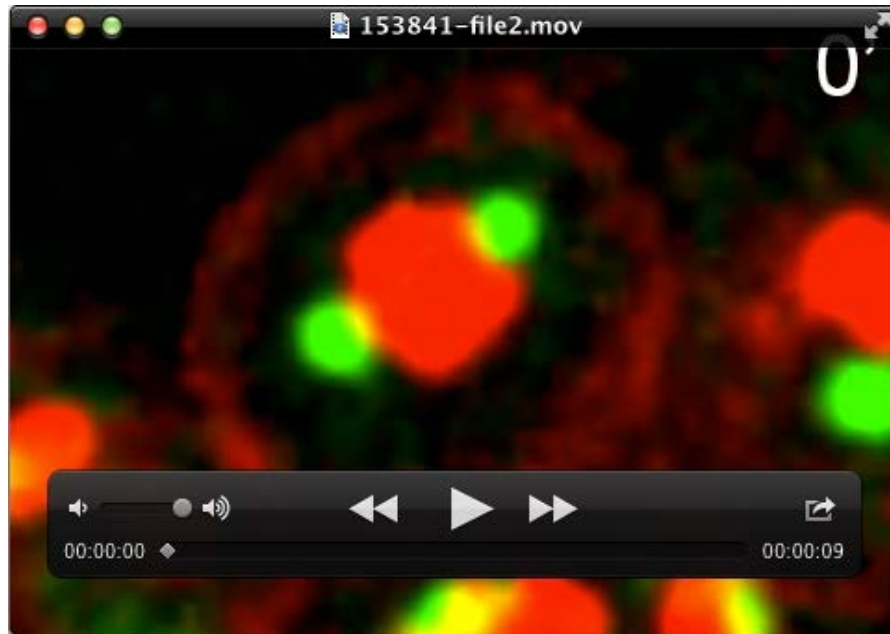

Movie 1, Related to Figure 2.  $\gamma$ -tubulin localization during the separation phase of spermatogenesis.

Live imaging of a wild-type spermatocyte expressing GFP: $\gamma$ -tubulin (green), histone:mCherry (red), and a membrane localized mCherry (red). Note the apparent movement of GFP: $\gamma$ -tubulin from the centrosome to the interface between the cell and residual body (RB). Time in minutes indicated in the upper right hand corner.

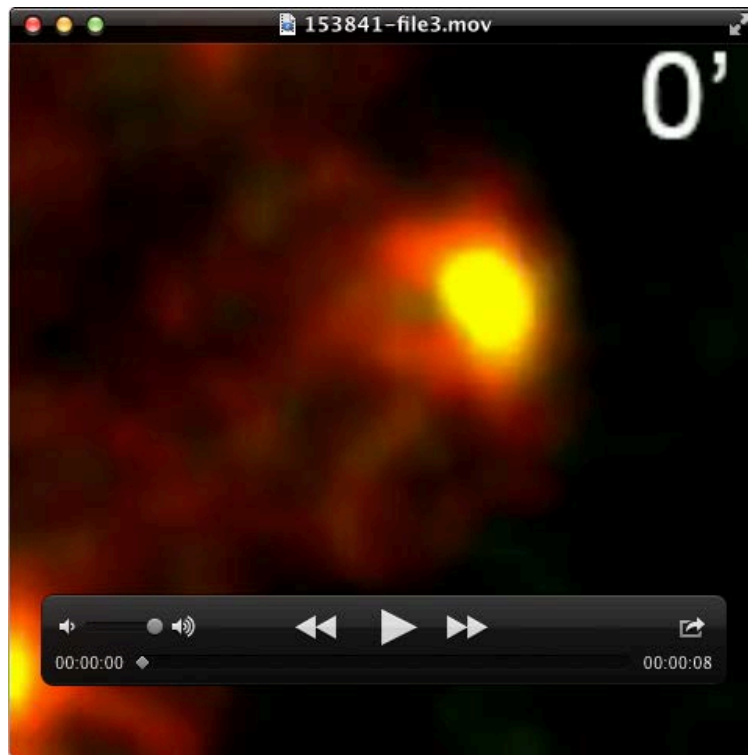

Movie 2, Related to Figure 2.  $\gamma$ -tubulin and  $\alpha$ -tubulin localization during the separation phase of spermatogenesis.

Live imaging of a wild-type spermatocyte expressing GFP: $\gamma$ -tubulin (green) and mCherry:TBA-1 ( $\alpha$ -tubulin, red). Microtubules appear to move from the centrosome to the residual body with associated GFP: $\gamma$ -tubulin. Time in minutes indicated in the upper right hand corner.
